# Supplementary material for: The Influence of Socio-Demographic Factors on Preference and Park Usage in Guangzhou, China
Source: MDPI journal article supplement (doi:10.3390/land11081219), 2022-08-02
Supplement: s1 [file s1]

## Supplementary Material

**Table S1.** Summary on the statistical tests undertaken for specific analysis.

| Section of Analysis                                                             | Methods of Statistical Test     | Purpose of Analysis                                                                                                                                                                                                                                                                                             |
|---------------------------------------------------------------------------------|---------------------------------|-----------------------------------------------------------------------------------------------------------------------------------------------------------------------------------------------------------------------------------------------------------------------------------------------------------------|
| 3.1. Visiting Preferences across Demographic Groups for Parks Visited on Foot   | Chi-square Test                 | To verify whether there are significant differences of visiting preferences (walking time, visiting duration, visiting frequency) among demographic groups (age, gender, educated level).                                                                                                                       |
|                                                                                 | Z-test and Cross Tabulation     | To indicate significant differences of visiting duration among some education groups.                                                                                                                                                                                                                           |
|                                                                                 | Chi-square Test                 | To explore the correlations between transport methods and traveling time, between visiting frequency, visiting duration and walking time.                                                                                                                                                                       |
| 3.2. Effect of Factors on Park Usage                                            |                                 | To explore the between-subjects effect of different walking time on the correlation between visiting frequency and visiting duration and to investigate the between-subject effects of different transportation modes on the correlation between traveling time and ease of access.                             |
|                                                                                 | Univariate General Linear Model |                                                                                                                                                                                                                                                                                                                 |
| 3.3. Motivations and Barriers on Park Visitation among Different Visitor Groups | Chi-square Test                 | To verify whether there are significant differences of visitor groups (age, gender, education, frequent/infrequent, traveling time, visiting duration) on their reasons for visiting parks; To explore the correlation between demographic groups (age, gender, educated level) and barriers on visiting parks. |
|                                                                                 | Cross Tabulation                | To explore specific differences of reasons and barriers among correlated visitor groups.                                                                                                                                                                                                                        |

Table S2. Summary on reasons to visit parks by population groups.

| Reasons for visiting parks     |                      |                   |                         |                             |                |                                |                           | Total |
|--------------------------------|----------------------|-------------------|-------------------------|-----------------------------|----------------|--------------------------------|---------------------------|-------|
|                                | Walking/<br>exercise | Relieve<br>stress | Gain<br>inspiratio<br>n | Socialize with<br>strangers | Enjoy<br>views | Meet with<br>friends or family | Pass by on<br>the commute |       |
| <b>All visits (N=2236)</b>     | 27%                  | 18%               | 18%                     | 15%                         | 12%            | 7%                             | 3%                        | 100%  |
| <b>By age</b>                  |                      |                   |                         |                             |                |                                |                           |       |
| 18-24                          | 33.62%               | 19.79%            | 13.62%                  | 12.66%                      | 11.91%         | 5.32%                          | 3.09%                     | 100%  |
| 25-30                          | 26.92%               | 16.91%            | 19.25%                  | 15.60%                      | 10.92%         | 7.28%                          | 3.12%                     | 100%  |
| 31-40                          | 25.02%               | 17.83%            | 18.89%                  | 15.44%                      | 13.23%         | 6.90%                          | 2.68%                     | 100%  |
| 41-50                          | 28.19%               | 17.53%            | 16.73%                  | 11.65%                      | 14.44%         | 8.67%                          | 2.79%                     | 100%  |
| >50                            | 31.82%               | 15.91%            | 15.91%                  | 17.05%                      | 10.23%         | 5.68%                          | 3.41%                     | 100%  |
| <b>By gender</b>               |                      |                   |                         |                             |                |                                |                           |       |
| Female                         | 27.60%               | 18.99%            | 16.54%                  | 12.24%                      | 14.77%         | 6.75%                          | 3.12%                     | 100%  |
| Male                           | 26.80%               | 16.85%            | 19.17%                  | 16.45%                      | 10.78%         | 7.15%                          | 2.80%                     | 100%  |
| <b>By education</b>            |                      |                   |                         |                             |                |                                |                           |       |
| High school and below          | 31.16%               | 14.92%            | 16.92%                  | 16.97%                      | 10.20%         | 7.42%                          | 2.41%                     | 100%  |
| High school to college         | 25.69%               | 17.56%            | 19.78%                  | 15.53%                      | 11.65%         | 7.21%                          | 2.59%                     | 100%  |
| Undergraduate and<br>above     | 28.18%               | 18.55%            | 16.36%                  | 13.45%                      | 13.64%         | 6.36%                          | 3.45%                     | 100%  |
| <b>By visiting frequency</b>   |                      |                   |                         |                             |                |                                |                           |       |
| Frequent (>= once a<br>month)  | 26.90%               | 17.55%            | 18.45%                  | 15.05%                      | 12.14%         | 6.98%                          | 2.92%                     | 100%  |
| Infrequent (< once a<br>month) | 37.74%               | 23.58%            | 3.77%                   | 4.72%                       | 19.81%         | 7.55%                          | 2.83%                     | 100%  |
| <b>By traveling time</b>       |                      |                   |                         |                             |                |                                |                           |       |
| <15 mins                       | 25.13%               | 17.71%            | 18.62%                  | 16.08%                      | 11.70%         | 6.91%                          | 3.85%                     | 100%  |
| 16-30 mins                     | 22.61%               | 17.60%            | 20.17%                  | 15.76%                      | 12.27%         | 8.20%                          | 3.39%                     | 100%  |
| 31-40 mins                     | 22.52%               | 17.14%            | 18.99%                  | 16.39%                      | 13.70%         | 8.40%                          | 2.86%                     | 100%  |
| >40 mins                       | 26.34%               | 18.41%            | 16.08%                  | 14.22%                      | 14.22%         | 8.39%                          | 2.33%                     | 100%  |
| <b>By visiting duration</b>    |                      |                   |                         |                             |                |                                |                           |       |
| <15 mins                       | 36.23%               | 13.58%            | 13.58%                  | 14.72%                      | 9.43%          | 4.91%                          | 7.55%                     | 100%  |
| 16-30 mins                     | 28.52%               | 16.70%            | 19.19%                  | 15.94%                      | 10.38%         | 6.38%                          | 2.90%                     | 100%  |
| 31-45 mins                     | 25.05%               | 18.04%            | 19.61%                  | 14.99%                      | 11.94%         | 7.62%                          | 2.74%                     | 100%  |
| 46-75mins                      | 25.32%               | 19.22%            | 16.49%                  | 14.08%                      | 15.34%         | 7.46%                          | 2.10%                     | 100%  |
| >75 mins                       | 27.38%               | 17.87%            | 15.59%                  | 12.17%                      | 16.73%         | 8.75%                          | 1.52%                     | 100%  |

<sup>1</sup> Colour denotes significant findings discussed within the main article. Darkness of cell's colour corresponds to the value in this cell (the darker the colour, the larger the value).

**Table S3.** Summary on barriers of visiting parks infrequently (less than once a month) by population groups.

|                          | Barriers on visiting parks |                     |                      |                   |             | Total   |
|--------------------------|----------------------------|---------------------|----------------------|-------------------|-------------|---------|
|                          | Lack of time               | Prefer Other places | Poor quality of park | Long walking time | No interest |         |
| <b>All visits (N=53)</b> | 52.63%                     | 18.42%              | 15.79%               | 10.53%            | 2.63%       | 100%    |
| <b>By age</b>            |                            |                     |                      |                   |             |         |
| 18-24                    | 47.37%                     | 47.37%              | 0.00%                | 5.26%             | 0.00%       | 100.00% |
| 25-30                    | 84.62%                     | 7.69%               | 0.00%                | 7.69%             | 0.00%       | 100.00% |
| 31-40                    | 47.06%                     | 5.88%               | 5.88%                | 0.00%             | 41.18%      | 100.00% |
| >40                      | 0.00%                      | 0.00%               | 50.00%               | 50.00%            | 0.00%       | 100.00% |
| <b>By gender</b>         |                            |                     |                      |                   |             |         |
| Female                   | 50.00%                     | 18.75%              | 14.58%               | 16.67%            | 0.00%       | 100.00% |
| Male                     | 26.67%                     | 13.33%              | 6.67%                | 6.67%             | 46.67%      | 100.00% |
| <b>By education</b>      |                            |                     |                      |                   |             |         |
| High school and below    | 50.00%                     | 0.00%               | 16.67%               | 16.67%            | 16.67%      | 100.00% |
| High school to college   | 10.00%                     | 80.00%              | 0.00%                | 10.00%            | 0.00%       | 100.00% |
| Undergraduate and above  | 50.00%                     | 25.00%              | 8.33%                | 16.67%            | 0.00%       | 100.00% |

<sup>1</sup> Colour denotes significant findings discussed within the main article. Darkness of cell's colour corresponds to the value in this cell (the darker the colour, the larger the value).
